# Supplementary material
Source: PubMed Central journal article supplement (PMC10401391)
Supplement: jamaotolaryngolheadnecksurg-e231729-s002.pdf [file jamaotolaryngolheadnecksurg-e231729-s002.pdf]

## Data Sharing Statement

Ferrarotto. Outcomes of Treatment With Neoadjuvant Cemiplimab for Patients With Advanced, Resectable Cutaneous Squamous Cell Carcinoma of the Head and Neck. *JAMA Otolaryngol Head Neck Surg*. Published August 03, 2023. doi:10.1001/jamaoto.2023.1729

### Data

**Data available:** Yes

**Data types:** Deidentified participant data

**How to access data:** Anonymized patient-level data underlying the findings described in this manuscript can be obtained upon request from qualified scientific and medical researchers. For data request, please contact the corresponding author.

**When available:** With publication

### Supporting Documents

**Document types:** None

### Additional Information

**Who can access the data:** Anonymized patient-level data underlying the findings described in this manuscript can be obtained upon request from qualified scientific and medical researchers.

**Types of analyses:** Any purpose

**Mechanisms of data availability:** For data request, please contact the corresponding author.
